# Supplementary material
Source: PubMed Central journal article supplement (PMC1735970)

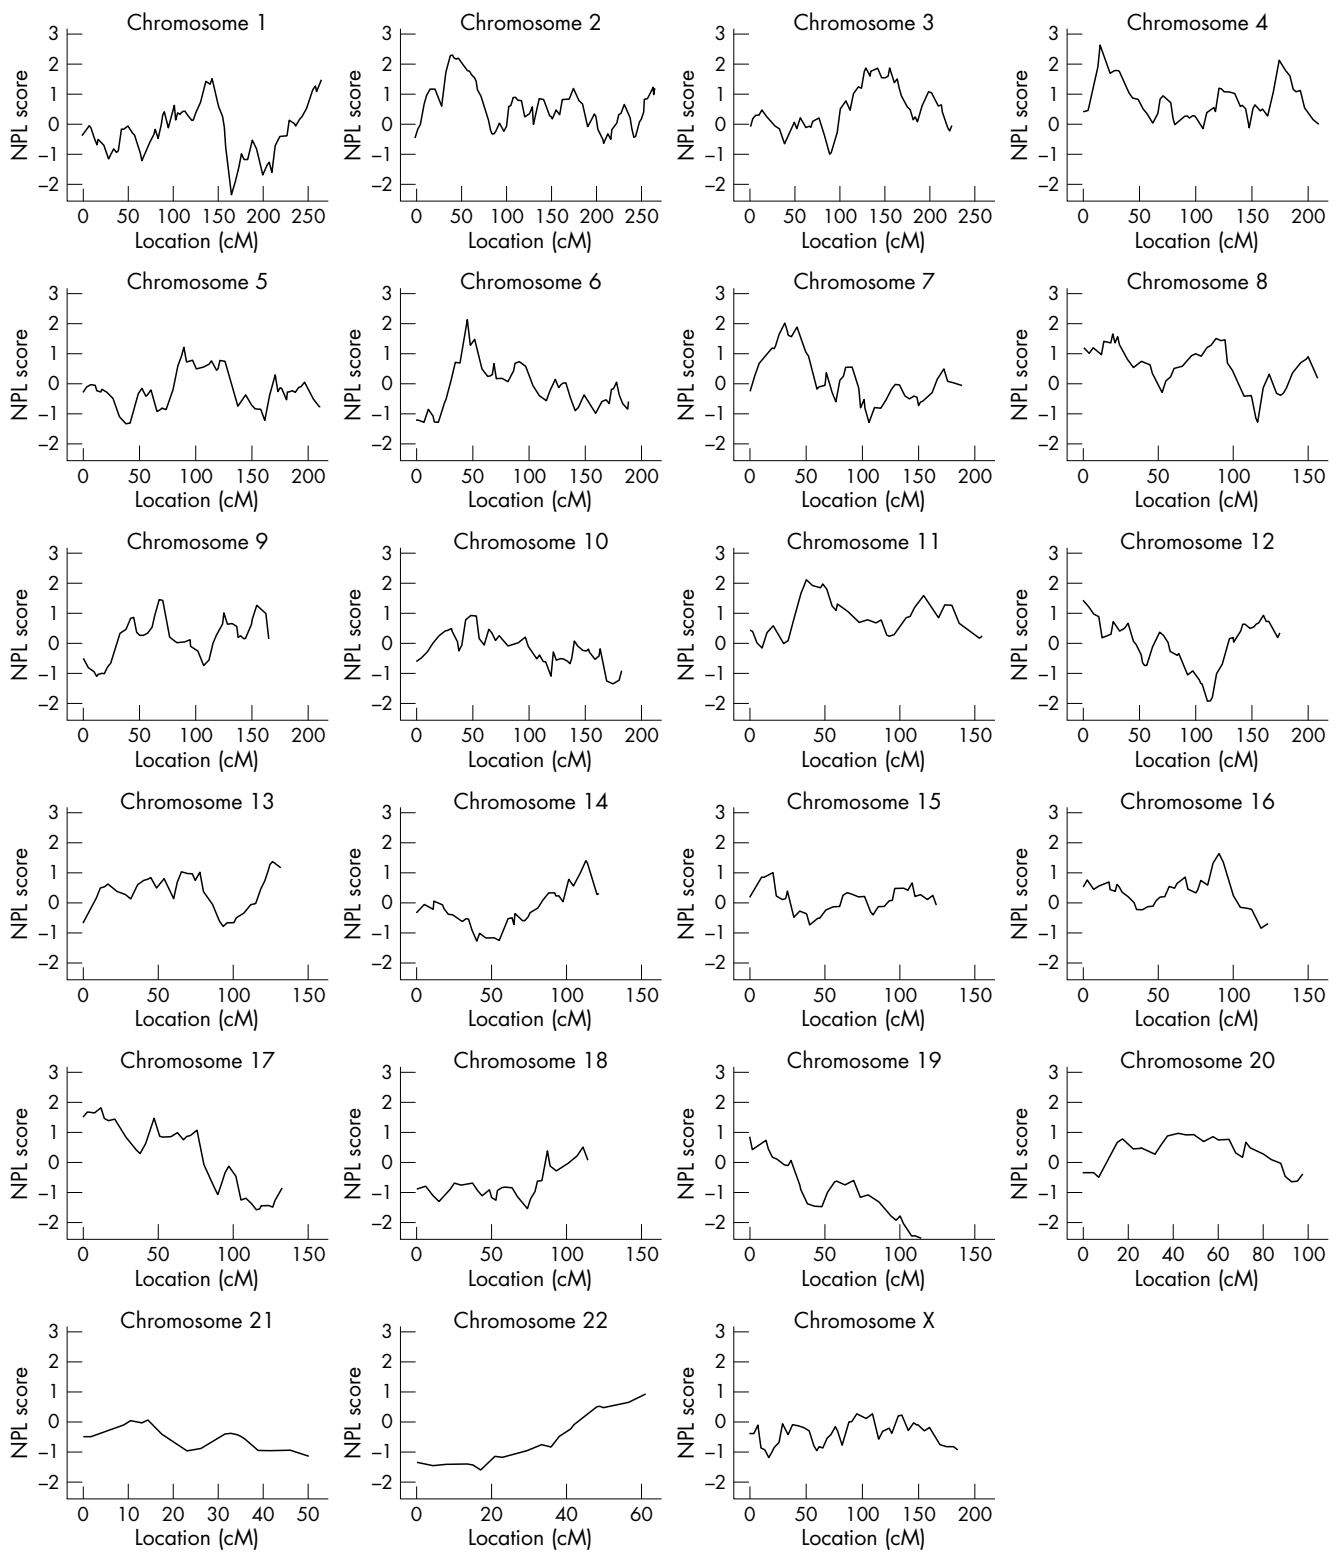

Supplement: jmedgene_42_12_952__1.pdf [file jmedgene_42_12_952__1.pdf]
